# Supplementary material
Source: Elsevier journal article supplement (https://knowledge.uchicago.edu/records/3bgmd-14552/files/mmc2.docx)
Supplement: mmc2 [file mmc2.docx]

**Supplementary Material**

**Linking ecomechanical models and functional traits to understand phenotypic diversity**

Timothy E. Higham1*, Lara A. Ferry2, Lars Schmitz3, Duncan J. Irschick4, Samuel Starko5,6, Philip S.L. Anderson7, Philip J. Bergmann8, Heather A. Jamniczky9, Leandro R. Monteiro10, Dina Navon11, Julie Messier12, Emily Carrington13, Stacy C. Farina14, Kara L. Feilich15, L. Patricia Hernandez16, Michele A. Johnson17, Sandy M. Kawano16, Chris J. Law13,18, Sarah J. Longo19, Christopher H. Martin20, Patrick T. Martone5, Alejandro Rico-Guevara13, Sharlene E. Santana13, and Karl J. Niklas21

1Department of Evolution, Ecology, and Organismal Biology, University of California, Riverside, CA, 92521, USA, 2School of Mathematical and Natural Sciences, Arizona State University, Glendale, AZ 85306 USA, 3 W.M. Keck Science Department, 925 N. Mills Ave., Claremont McKenna, Pitzer, and Scripps Colleges, Claremont, CA, 91711, USA, 4Organismic and Evolutionary Biology Program, University of Massachusetts Amherst, Amherst, MA 01003, USA, 5Botany Department and Biodiversity Research Centre, University of British Columbia, Vancouver, BC, V6T 1Z4, Canada, 6Department of Biology, University of Victoria, Victoria, BC V8W 2Y2, Canada, 7Department of Evolution, Ecology, and Behavior, University of Illinois at Urbana-Champaign, Urbana, IL 61801, USA, 8Biology Department, Clark University, 950 Main Street, Worcester, MA 01610, USA, 9Department of Cell Biology & Anatomy, University of Calgary, Calgary, T2N 1N4, Canada, 10Laboratório de Ciências Ambientais, Universidade Estadual do Norte Fluminense. Av. Alberto Lamego 2000, Campos dos Goytacazes, RJ, cep 28013-602, Brazil, 11Human Genetics Institute of NJ, Rutgers University, Piscataway NJ 08854, USA, 12Department of Biology, University of Waterloo, 200 University Ave. W., Waterloo, Ontario, N2L 3G1, Canada, 13Department of Biology, University of Washington, Seattle WA 98195, USA, 14Department of Biology, Howard University, 415 College Street NW, Washington, DC, 20059, USA, 15Department of Organismal Biology and Anatomy, University of Chicago, 1027 E 57th Street, Chicago, IL 60637, USA, 16Department of Biological Sciences, The George Washington University, Washington, DC, 20052, USA, 17Department of Biology, Trinity University, San Antonio TX 78212 USA, 18Department of Mammalogy & Division of Paleontology, Richard Gilder Graduate School, American Museum of Natural History, 200 Central Park West, New York, New York 10024, USA, 19Department of Biological Sciences, Towson University, Towson, MD, 21252, USA, 20Integrative Biology and Museum of Vertebrate Zoology, University of California, Berkeley, California 94720, USA, 21School of Integrative Plant Science, Cornell University, Ithaca, NY, USA

**Supplementary Figure S1:** Examples of systems to which our framework could be readily applied. All of these systems have a strong biophysical basis (see text), and could be explored across many different organisms. A) running across water, B) vertebrate bite force (bat skull based on [1], arrows represent the action of jaw adductors), C) Flight power curves based on representative values of morphological variables for two species of bat. For *Carollia perspicillata* (Seba’s short-tailed bat), body mass = 0.0158 Kg, wingspan = 0.29 m, wing area = 0.014 m2. For *Molossus fluminensis* (mastiff bat), body mass = 0.029 Kg, wingspan = 0.3 m, wing area = 0.01 m2. Solid black line depicts the power required to fly at each speed, based on the aerodynamic model presented in [2]. The solid orange line is the distance range obtained for each unit of work. Dotted lines indicate minimum power speeds (Vmp) and maximum range speeds (Vmr). The species shape profiles in ventral view show relative differences in aspect ratio and wing area relative to body size. D) Ordination in a morphospace based on principal components of bat wing variables (modified from [2]). The axes are based on 257 species, but only representative species and profiles are shown, as well as postulated flight specializations for each quadrant of the ordination space.

**Examples of models that can utilize our framework in future studies**

Numerous models lend themselves to our framework, which include both functional traits and environmental variables. We have illustrated some of those below, but there are likely countless other examples that could be examined.

**Running on fluids**

At least 1200 species of animals run on water, and although most of these are small invertebrates, some are larger, including geckos (~5g), basilisk lizards (~100g) (Fig. 5B), and dolphins (~2x105g) [3]. Surface tension is an integral part of the behavior in those under 1g and plays a role in geckos [4], but contributes negligible upward forces in larger animals, where hydrodynamic forces dominate [5]. These forces have been modeled for the initial slap of the animal’s limb as it hit the water and moves vertically downward, and the stroke as the limb is moving through the water [6]. The impulse generated during slap is modeled as:

,

where *ρ* is the density of water, *reff* is the effective radius of a circle whose area is equal to that of the propulsive organ, and *umax* is maximal speed of the limb during slap [5, 7]. This equation models the volume of water accelerated by the limb during slap. The impulse generated during stroke is the product of the drag force and the time over which it is applied:

,

where *S* is the surface area of the propulsive organ, *urms* is the root mean square of the velocity during stroke, *g* is the gravitational constant, *LL* is the maximal depth of the propulsive organ, and *CD** is the water entry drag coefficient, which is constant between ~1-200g [8], and may be calculated experimentally as

,

where *D(t)* is drag measured through time during the stroke and *h(t)* is the depth of the propulsive organ through time [9]. Whether the generated impulse is sufficient for keeping an animal on the surface is simply done by summing impulses generated by the animal and dividing by the needed impulse, which is simply a product of the stride cycle duration and the weight of the animal [8]. Although about four times as much impulse is generated during stroke than slap, slap generates predominantly vertical forces, while stroke generates similar vertical and fore-aft forces [8, 10]. For smaller sizes, below 1g, hydrodynamic forces play a smaller role and surface tension a greater role [3]. To account for this, the force due to surface tension is

,

and the ratio of surface tension force to fluid inertia force is

),

where *γ* is the surface tension of water in air (0.072 Nm-1). This example clearly illustrates the reliance on a combination of functional traits (e.g., body size) and environmental variables (e.g., water density).

**Bite force**

The ability of an animal to bite forcefully is important for feeding, defense, and other behaviors, and presents an interesting test case for our discussion here (Fig. 5C). Bite force is impacted by several factors, including jaw size and shape, the amount of muscle in the jaw, and the basic lever mechanics. Some of the earliest and simplest bite force models treat the lower jaw of mammals as a third-class lever [11, 12] or, in some cases, a second-class lever [13] system in which the jaw is considered a beam that rotates about a fulcrum (the temporomandibular joint) as a result of the input forces applied by the jaw adductor muscles. The basic parameters of this model include jaw adductor forces, which can be estimated using their physiological cross-sectional area and muscle fiber properties, the moment arms of the jaw muscles, and the output point along the dentition (out-lever). Ultimately, the output of bite force models is an estimate of the force applied at the tooth that defines the out-lever. Over the years, increasingly complex and realistic versions of this model have been developed to take into account morphological and functional parameters such as the shape of the dentition at the bite point [14], the degree of jaw muscles’ wrapping across their attachment areas [15], internal muscle fiber architecture [16], and the force vectors from the angles of multiple muscle attachments [17]. Bite force models ranging across these degrees of complexity have also been applied broadly to groups outside of mammals, including fish, reptiles, birds and extinct groups. One relatively basic model used by [1] is

where is the sum of the muscle moments generated by all cranial muscles about the temporomandibular joint. These are then divided by the out lever at the position of biting (canine and molar) (Fig. 5C).

Much like the other models presented, the parameters that comprise these bite force models show significant variation at time scales ranging from milliseconds to ontogeny, ecology and evolutionary scales. The rate at which a bite occurs can drastically alter how the material being bit will respond to impact forces and what type of dental tool is most appropriate [18, 19]. Generating higher bite speeds also requires potential alterations to muscle architecture and firing behavior [20].  While ontogenetic changes have been found in bite forces across many animals from bats [21] to fishes [22], it is often unclear what parameters of the models have changed. One study on lab mice fed on diets of varying mechanical properties showed shape differences in the jaws that directly altered mechanical advantage [23]. ​Similarly, wild and captive-reared carnivoran skulls exhibit differences in craniomandibular traits associated with attachment sites of masticatory muscles used to generate bite force [16, 24].

At the ecological scale, food processing (biting) behavior can be linked to tooth form to heavily modulate how bite force is applied. For example, animals can choose where along the jaws they bite depending on the food type being consumed, which alters the mechanical advantage of the jaw lever system by changing the outlever and which teeth are being used to apply the bite [25]. Variation in tooth form along the jaw can amplify this effect, with rounded cusp like teeth further back in the jaw where bite forces are higher for dealing with hard, resistant food like nuts [14] and sharp teeth in front where forces are lower for soft, but tough foods like flesh and sinew [14]. Evolutionarily, there is ample evidence that virtually all parameters included in bite force models can evolve in tandem with the physical demands imposed by diet, such as jaw adductor muscles [1]; cranium and mandible shape [26]; and tooth shape [27]. There is also evidence that selection can operate on the full output of the system [28], possibly as a result of intrinsic constraints or functional redundancy [28, 29]. For example, durophagous vertebrates across various clades have converged on similar skull morphologies such as shorter jaw lengths, increased jaw adductor muscle attachment sites and volumes, and molariform dentition [30].

**Aerodynamics and flight**

Active flight in vertebrates is achieved through a range of striking physiological and morphological adaptations, opening a window of ecological diversification for the two extant groups (bats and birds) in which it evolved [2]. This functional diversity has been studied mainly through estimates of performance based on the energetic cost of flight [31]. Power estimates can be achieved through aerodynamic models based on fixed wing theory [2], direct measurements of metabolic expenditure [32], measurements of forces applied by flight muscles [33], or the kinetic energy of generated wakes [34]. The simple aerodynamic models provide a reasonable approximation of general patterns of variation in power requirements, but there is some uncertainty in parameter estimation that needs to be recognized, particularly when comparing ecologically and morphologically similar species.

The power required to fly, according to the aerodynamic model described in [2], is the sum of three main power components. Induced power is the work needed to generate lift and thrust, overcoming the induced drag. Profile power is the work needed against form and friction drag of the wing. Parasite power is the work required to overcome form and friction drag of the body. The sum can be represented as

where the morphological variables are *M* (body mass in Kg), *b* is the wingspan (in m), and *S* is wing area (in m2). *Ae* is the equivalent flat plate area ([2.85 x 10-3] *M*2/3) which is defined as the area of a flat plate with the same mass as the body, with a drag coefficient of 1, *k* is the induced drag factor (constant = 1.2), *g* is the acceleration of gravity (9.8 m/s/s), *V* is the flight speed, *ρ* is the air density (1.205 Kg/m3), CD, pro is the profile drag coefficient (typical value assumed to be 0.02). The aerodynamic model predicts the energetic cost of flight, given a flight speed, a specific wing geometry and body mass.

The power curves present a “U” shape (Fig. 5D), where the minimum should be indicative of an optimal speed of lowest energy cost (minimum power speed – Vmp) that maximizes endurance, or the time spent flying. The maximum range speed (Vmr) is the speed that allows the animal to reach the longest distance (the maximum the distance travelled per work unit; Y = V/P). Depending on the trade-offs due to selective pressures in different ecological backgrounds, it is expected that performance will be dependent on the most relevant parameter. For example, species that forage in cluttered spaces are expected to fly at slower speeds. Migrating species are expected to fly at higher speeds that allow for covering more distance.

Figure 5D depicts curves based on average measurements from two bat species: *Carollia perspicillata* and *Molossus fluminensis*. The species with higher wing load (*Mg*/*S*) and higher aspect ratio (b2/S) (*M. rufus*) presents higher optimal speeds, as commonly observed in bats that forage in open areas hunting insects. *Carollia perspicillata* presents lower wing load and aspect ratio, optimal for slower, more manoeuvrable flights in the forest understory, where it forages for fruit. Norberg & Rayner [35] calculated ecomorphological trends in the ordination of 257 bat species according to the correlations among wing morphology and functional parameters estimated from the aerodynamic model (a summary of the ordination is presented in Fig. 5E, modified from [2]. This phenotype-performance association generates testable hypotheses and new questions. However, the morphological measurements and the model do not take into account that bat wings are highly compliant and can change their form to adjust flapping dynamics [34, 36]. Maneuverability, the ability to change direction avoiding obstacles, can be predicted by the minimum turning radius:

achieved when banking at an angle of 90°. Lower wing loading will decrease the radius, but bats can also change the anteroposterior curvature of the wing (camber) to increase the lift coefficient (CL) at slow speeds. Species with increased capacity to adjust wing camber presented higher ability to avoid obstacles [37].

Although bats are one of the most diverse mammalian orders, with ~1400 species, detailed studies on the functional morphology of flight are available mostly for wind tunnel experiments using a handful of species. While providing essential data and tests of hypotheses, the functional demands imposed by steady forward flight in the experimental setting are limited [36]. It is extremely difficult to impose a wide range of controlled functional demands at the same time (*e.g.* speed and maneuverability) experimentally. Some general ecomorphological patterns of wing shape and function are well established [38], but the range of functional diversity in bat flight biomechanics is yet to be explored with studies addressing a wider universe of phylogenetic and ecologically distinct species. Because of the close dependency on functional traits (morphology) and the environment (air parameters), flight is an ideal system for an ecomechanical approach.

**Supplementary References**

1. Santana, S.E. et al. (2010) Mechanics of bite force production and its relationship to diet in bats. Functional Ecology 24, 776-784.

2. Norberg, U.M. (1990) Vertebrate flight: mechanics, physiology, morphology, ecology and evolution, Springer-Verlag.

3. Bush, J.W. and Hu, D.L. (2006) Walking on Water: Biolocomotion at the Interface. Annual Revew of Fluid Mechanics 38, 339-369.

4. Nirody, J.A. et al. (2018) Geckos race across the water's surface using multiple mechanisms. Current Biology 28, 4046-4051.

5. Glasheen, J. and Mcmahon, T. (1996) Size-dependence of water-running ability in basilisk lizards (*Basiliscus basiliscus*). Journal of Experimental Biology 199, 2611-2618.

6. Hsieh, S.T. (2003) Three-dimensional hindlimb kinematics of water running in the plumed basilisk lizard (*Basiliscus plumifrons*). The Journal of Experimental Biology 206, 4363-4377.

7. Floyd, S. and Sitti, M. (2008) Design and Development of the Lifting and Propulsion Mechanism for a Biologically Inspired Water Runner Robot. IEEE Transactions on Robotics 24, 698-709.

8. Glasheen, J.W. and McMahon, T.A. (1996) A hydrodynamic model of locomotion in the Basilisk lizard. Nature 380, 340-342.

9. Glasheen, J.W. and McMahon, T.A. (1996) Vertical water entry of disks at low Froude numbers. Physics of Fluids 8, 2078-2083.

10. Hsieh, S.T. and Lauder, G.V. (2004) Running on water: Three-dimensional force generation by basilisk lizards. Proceedings of the National Academy of Sciences USA 101, 16784-16788.

11. Crompton, A.W. (1963) The evolution of the mammalian jaw. Evolution 17, 431-439.

12. Greaves, W.S. (1979) The jaw lever system in ungulates: a new model. Journal of Zoology 184, 271-285.

13. Turnbull, W.D. (1970) Mammalian masticatory apparatus. Fieldiana Geology 18, 147-356.

14. Lucas, P.W. (2004) Dental Functional Morphology: how teeth work, Cambridge University Press.

15. Davis, J.L. et al. (2010) Predicting bite force in mammals: two-dimensional versus three-dimensional models. Journal of Experimental Biology 213, 1844-1851.

16. Hartstone-Rose, A. et al. (2012) Bite Force estimation and the Fiber Architecture of Felid Masticatory Muscles. Anatomical Record 295, 1336-1351.

17. Westneat, M.W. (2003) A biomechanical model for analysis of muscle force, power output and lower jaw motion in fishes. Journal of Theoretical Biology 223, 269-281.

18. Korn, K.A. et al. (2016) Modeling tooth-prey interactions in sharks - the importance of dynamic testing. Royal Society Open Science 3, 160141.

19. Anderson, P.S.L. et al. (2019) Taking a stab at quantifying the energetics of biological puncture. Integrative and Comparative Biology 59, 1586-1596.

20. Watson, P.J. et al. (2014) Masticatory biomechanics in the rabbit: a multi-body dynamics analysis. Royal Society Interface 11, 20140564.

21. Santana, S.E. and Miller, K.E. (2016) Extreme postnatal scaling in bat feeding performance: a view of ecomorphology from ontogenetic and macroevolutionary perspectives. Integrative and Comparative Biology 56, 459-468.

22. Hernandez, L.P. and Motta, P.J. (1997) Trophic consequences of differential performance: ontogeny of oral jaw crushing performance in the sheepshead, *Archosargus probatocephalus* (Teleostei: Sparidae). Journal of Zoology 243, 737-756.

23. Anderson, P.S.L. et al. (2014) Adaptive plasticity in the mouse mandible. BMC Evolutionary Biology 14, 85-93.

24. Curtis, A.A. et al. (2018) Diet-related differences in craniodental morphology between captive-reared and wild coyotes, *Canis latrans* (Carnivora: Canidae). Biological Journal of the Linnean Society 123, 677-693.

25. Santana, S.E. and Dumont, E.R. (2009) Connecting behaviour and performance: the evolution of biting behaviour and bite performance in bats. Journal of Evolutionary Biology 22, 2131-2145.

26. Herrel, A. et al. (2002) Evolution of bite performance in turtles. Journal of Evolutionary Biology 15, 1083-1094.

27. Ungar, P.S. et al. (2017) Dental topography and diets of platyrrhine primates. Historical Biology 30, 64-75.

28. Alfaro, M.E. et al. (2005) Evolutionary consequences of many-to-one mapping of jaw morphology to mechanics of labrid fishes. American Naturalist 165, E140-E154.

29. Wainwright, P.C. et al. (2005) Many-to-one mapping of form to function: a general principle in organismal design? Integrative and Comparative Biology 45, 256-262.

30. Collar, D.C. et al. (2014) Imperfect morphological convergence: variable changes in cranial structures underlie transitions to durophagy in moray eels. American Naturalist 183, E168-E184.

31. Hedenström, A. and Johansson, L.C. (2015) Bat flight: aerodynamics, kinematics and flight morphology. Journal of Experimental Biology 218, 653-663.

32. von Busse, R. et al. (2013) Flight metabolism in relation to speed in Chiroptera: testing the U-shape paradigm in the short-tailed fruit bat *Carollia perspicillata*. Journal of Experimental Biology 216, 2073-2080.

33. Hedenström, A. et al. (2009) Bird or bat: comparing airframe design and flight performance. Bioinspiration and Biomimetics 4, 015001.

34. Swartz, S.M. et al. (2012) A bird? A plane? No, it’s a bat: an introduction to the biomechanics of bat flight. In Evolutionary history of bats: fossils, molecules and morphology (Gunnell, G.F. and Simmons, N.B. eds), pp. 317-352, Cambridge University Press.

35. Norberg, U.M. and Rayner, J.M.V. (1987) Ecological morphology and flight in bats (Mammalia; Chiroptera): wing adaptations, flight performance, foraging strategy and echolocation. Phil. Trans. R. Soc. Lond. 316, 335-427.

36. Swartz, S.M. and Konow, N. (2015) Advances in the study of bat flight: the wing and the wind. Canadian Journal of Zoology 93, 977-990.

37. Stockwell, E.F. (2001) Morphology and flight manoeuvrability in New World leaf-nosed bats (Chiroptera: Phyllostomidae). Journal of Zoology 254, 505-514.

38. Marinello, M. and Bernard, E. (2014) Wing morphology of Neotropical bats: a quantitative and qualitative analysis with implications for habitat use. Canadian Journal of Zoology 92, 141-147.
